# Supplementary figures and images for: A Novel Gonadotropic Microsporidian Parasite (Microsporidium clinchi n. sp.) Infecting a Declining Population of Pheasantshell Mussels (Actinonaias pectorosa) (Unioinidae) from the Clinch River, USA
Source: MDPI journal article supplement (doi:10.3390/parasitologia2010001), 2022-01-01

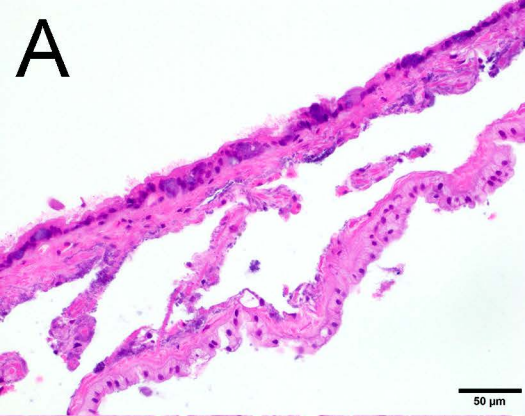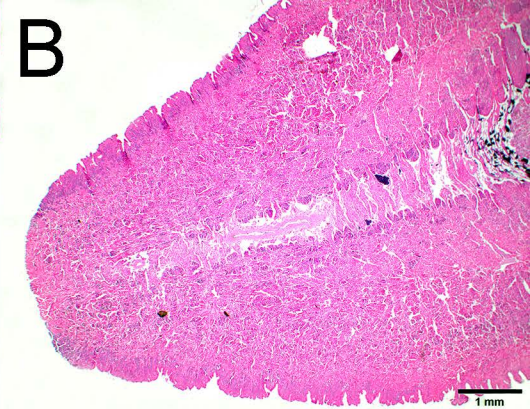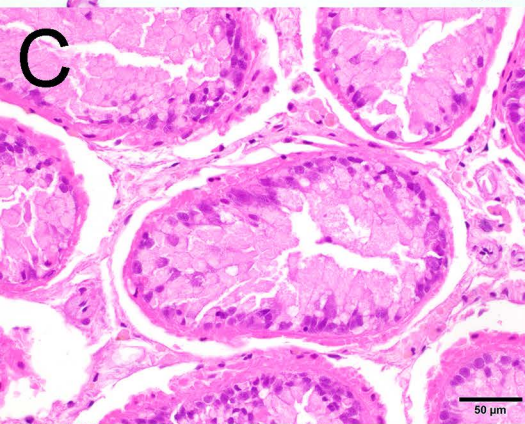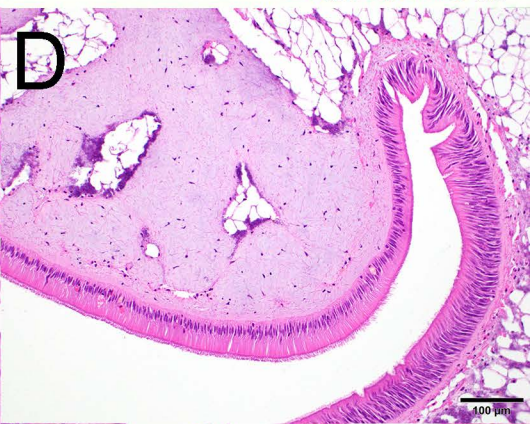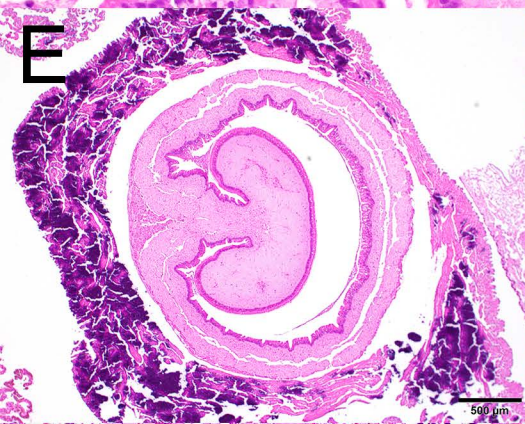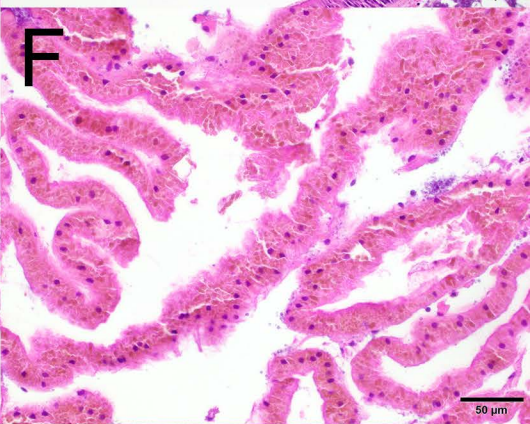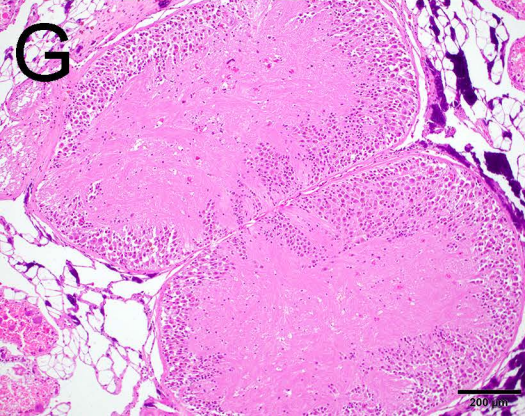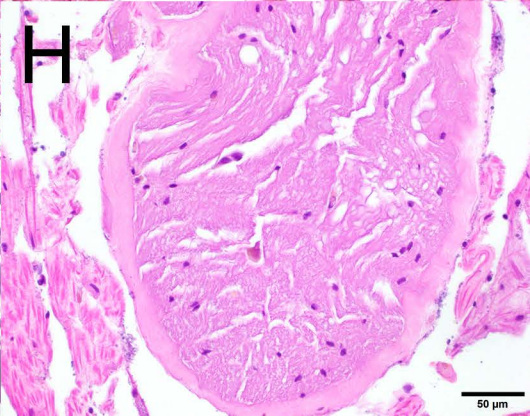

Supplement: s1 [file s1]
